# Supplementary material for: A water-stable photochromic MOF with controllable iodine sorption and efficient removal of dichromate
Source: Royal Society of Chemistry journal article supplement (doi:10.1039/d1ce00935d), 2021-01-01
Supplement: d1ce00935d1.pdf [file d1ce00935d1.pdf]

## Water-stable photochromic MOFs with regulable iodine sorption and efficient removal of dichromate

Jian-Jun Liu,<sup>\*a</sup> Jia-Jia Fu,<sup>a</sup> Gui-Jun Li,<sup>a</sup> Teng Liu,<sup>a</sup> Shu-Biao Xia,<sup>\*a</sup> Fei-Xiang Cheng<sup>\*a</sup>

<sup>a</sup>College of Chemistry and Environmental Science, Qujing Normal University, Qujing 655011, China. E-mail: jjliu302@163.com (J.-J. Liu); xiashubiao401@163.com (S.-B. Xia); chengfx2019@163.com (F.-X Cheng)

### Procedure for anion-exchange

As-synthesized **1-NO<sub>3</sub>** (335 mg) was dried 60 °C in 2 hours, divided into 5 equal portions, then immersed in an aqueous solution (10 mL) of K<sub>2</sub>Cr<sub>2</sub>O<sub>7</sub> at the concentration (2 mM), and the mixture keep static at room temperature for 200 min. The anion exchange process was monitored by liquid UV-vis spectroscopy based on typical absorption of Cr<sub>2</sub>O<sub>7</sub><sup>2-</sup> at 258 nm. 3 mL aqueous K<sub>2</sub>Cr<sub>2</sub>O<sub>7</sub> solution was pipetted at

different time interval from different vials, and was measured the UV-vis adsorption intensity. After exchange, the solid samples were centrifuged, rinsed with water and dried in the air, namely **1-Cr<sub>2</sub>O<sub>7</sub>**. The same processes for **1-NO<sub>3</sub>** were carried out at 4 mM, 6 mM aqueous solution (10 mL) of K<sub>2</sub>Cr<sub>2</sub>O<sub>7</sub>. After anion exchange, the crystals were filtered, rinsed with deionized water and dried in the air. These samples were used for PXRD, IR, EDX, and ICP measurements.

### **Release experiment**

The release experiment was carried out right after the completion of an ion-exchange process of Cr<sub>2</sub>O<sub>7</sub><sup>2-</sup> on **1-NO<sub>3</sub>** at the 6 mM. The **1-Cr<sub>2</sub>O<sub>7</sub>** washed with water and MeOH before release operation. The sample of **1-Cr<sub>2</sub>O<sub>7</sub>** (67 mg) was immersed in 10 mL aqueous solution containing 287 mg KNO<sub>3</sub> (100 fold molar ratio of that of Cr<sub>2</sub>O<sub>7</sub><sup>2-</sup>) at room temperature. The resulting mixture was monitored by UV-Vis spectroscopy.

### **Anion Selectivity Studies**

As-synthesized sample of **1-NO<sub>3</sub>** (67 mg) was immersed in an aqueous solution (10 mL) of K<sub>2</sub>Cr<sub>2</sub>O<sub>7</sub> (2 mM), and then KNO<sub>3</sub>, KCl, KBr or KClO<sub>4</sub> (2 mM or 10 mM) was added. After 24 h, the solutions were monitored by UV-Vis absorption spectroscopy at room temperature.

### **Capture and release of iodine experiments**

At room temperature, 67 mg of **1-NO<sub>3</sub>** or photoirradiated **1-NO<sub>3</sub>** were respectively added to cyclohexane solution dissolved with iodine (10 mL, 0.5 mM). UV-Vis absorption spectroscopy was applied to monitor the kinetics of iodine adsorption by the materials. The release experiment was carried out right after the completion of iodine adsorption process on **1-NO<sub>3</sub>** at the 2 mM of iodine solution. At room temperature, 67 mg of **1-NO<sub>3</sub>** or photoirradiated **1-NO<sub>3</sub>** was put into an iodine-dissolved cyclohexane solution (10 mL, 2 mM) for 24 h to prepare the iodine-loaded sample (**1-NO<sub>3</sub>-I<sub>2</sub>**). Then 20 mg of **1-NO<sub>3</sub>-I<sub>2</sub>** was soaked in ethanol (10 mL). The residual concentration of iodine solution was measured by an UV-Vis spectrometer. These samples **1-NO<sub>3</sub>-I<sub>2</sub>** and photoirradiated **1-NO<sub>3</sub>-I<sub>2</sub>** were also used for elemental analyses and XPS measurements.

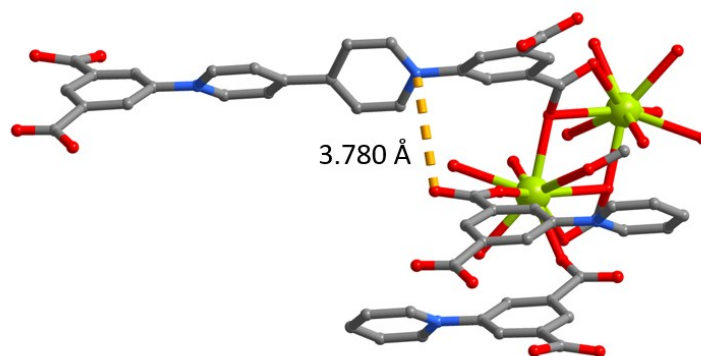

Fig. S1. Distance between the carboxylate O atom of the bdpbpy<sup>2-</sup> ligand and adjacent bipyridinium in 1-NO<sub>3</sub>

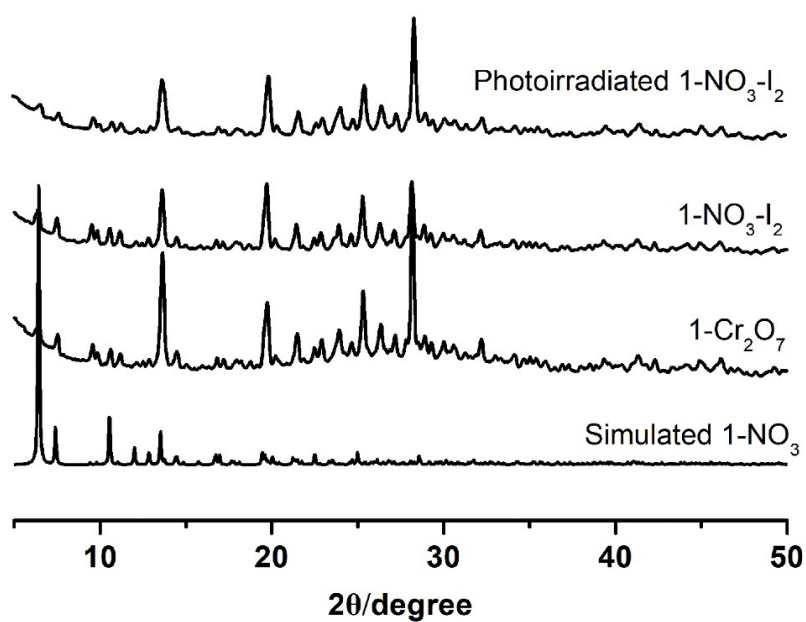

Fig. S2. The PXRD patterns of 1-NO<sub>3</sub> after being treated in different conditions.

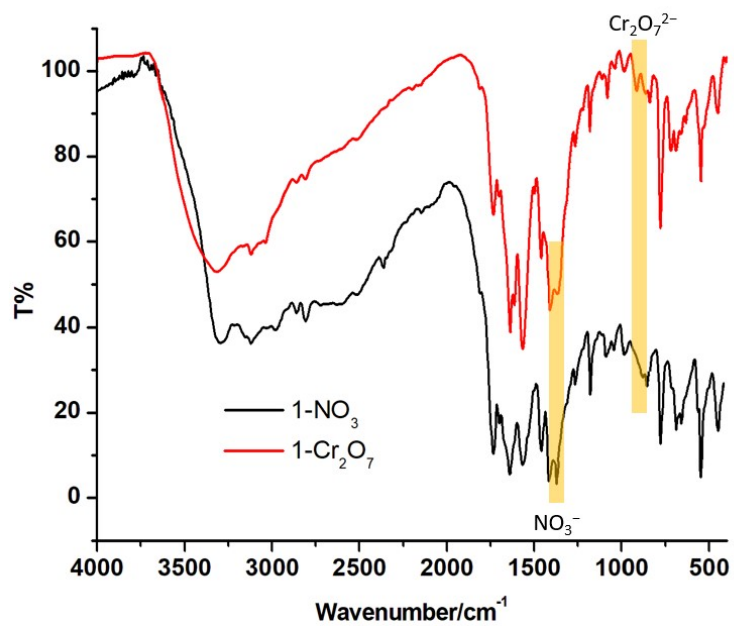

Fig. S3. IR spectra of 1-NO<sub>3</sub> and 1-Cr<sub>2</sub>O<sub>7</sub>.

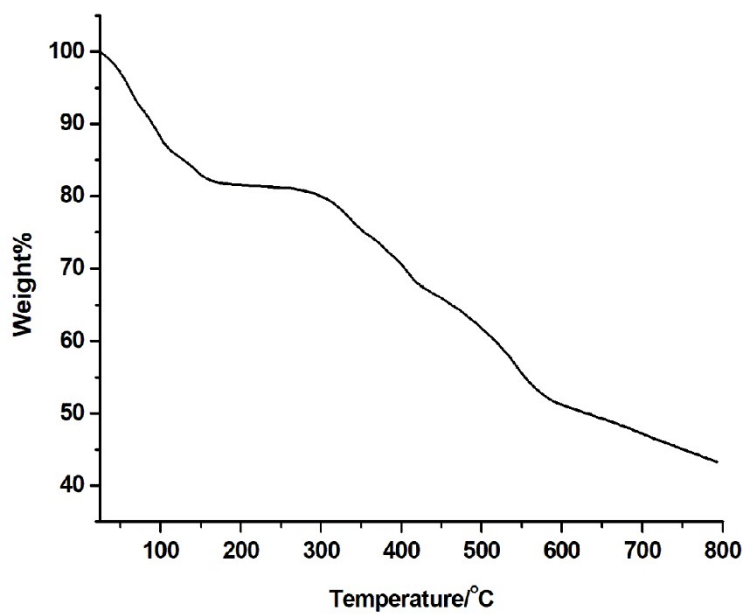

Fig. S4. TGA curve of 1-NO<sub>3</sub>.

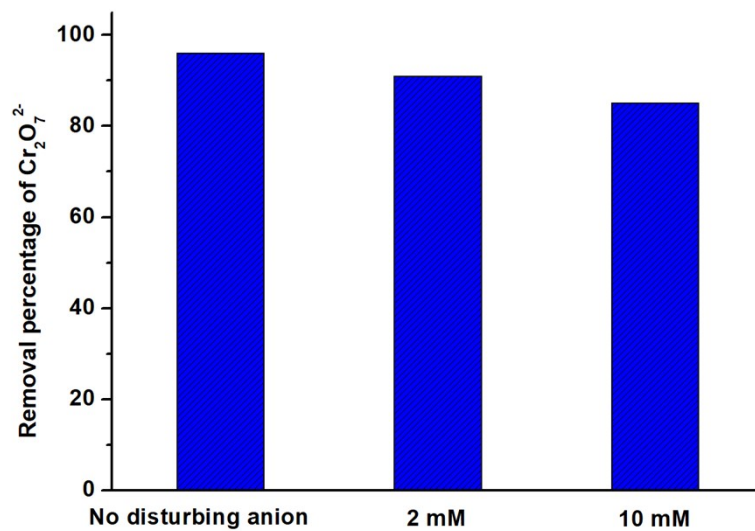

Fig. S5. Effects of the competing anions on the removal of  $\text{Cr}_2\text{O}_7^{2-}$  by  $\mathbf{1-NO}_3$ . The initial concentration of  $\text{Cr}_2\text{O}_7^{2-}$  is 2 mM. The mixed solution containing of  $\text{NO}_3^-$ ,  $\text{Cl}^-$ ,  $\text{Br}^-$  and  $\text{ClO}_4^-$ . The concentration of each anion is 0 mM, 2 mM, and 10 mM.

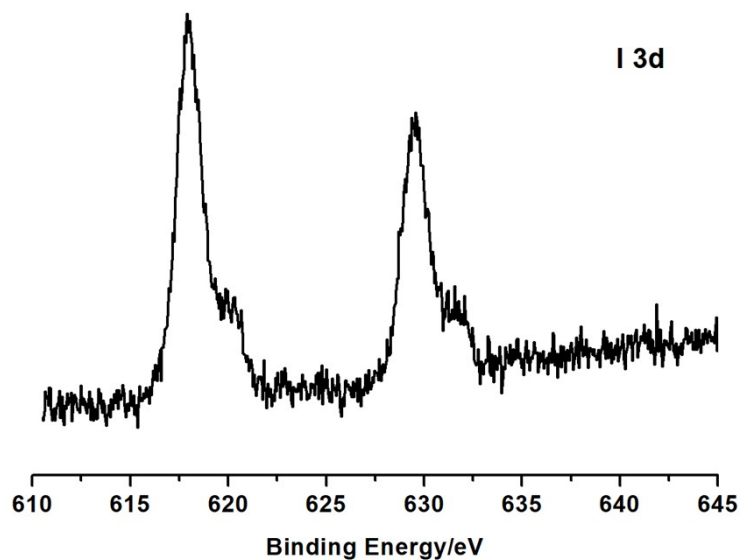

Fig. S6. XPS core-level spectra of I 3d of  $\mathbf{1-NO}_3\text{-I}_2$ .

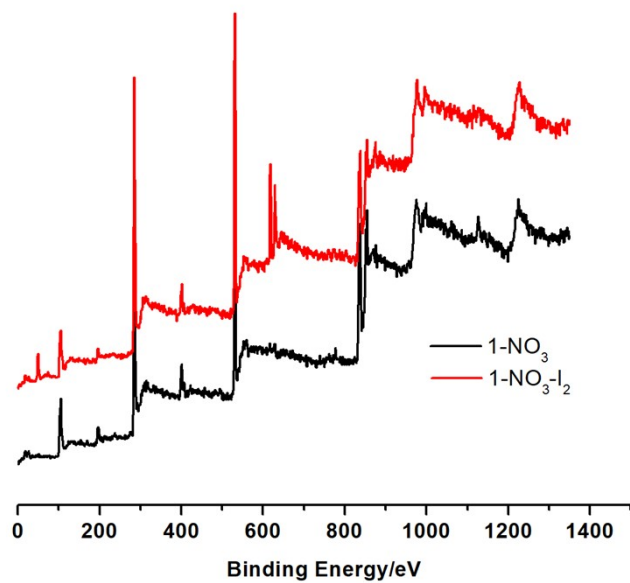

Fig. S7. XPS for  $1\text{-NO}_3$  and  $1\text{-NO}_3\text{-I}_2$ .

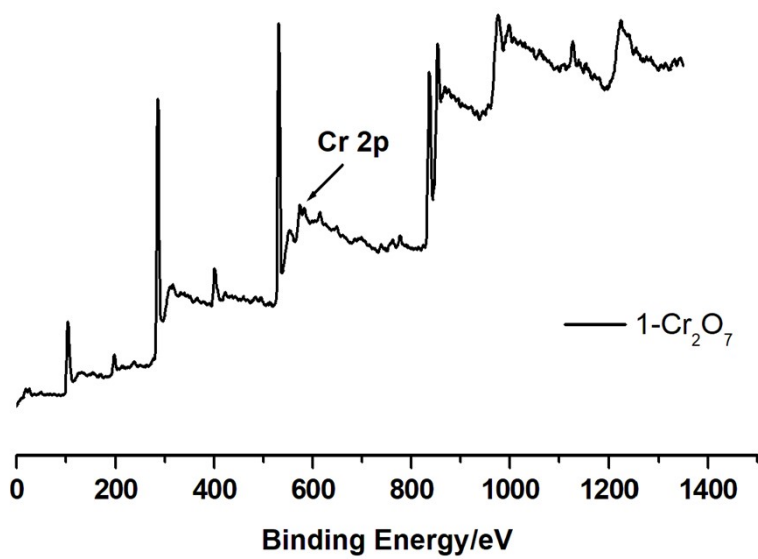

Fig. S8. XPS for  $1\text{-Cr}_2\text{O}_7$ .

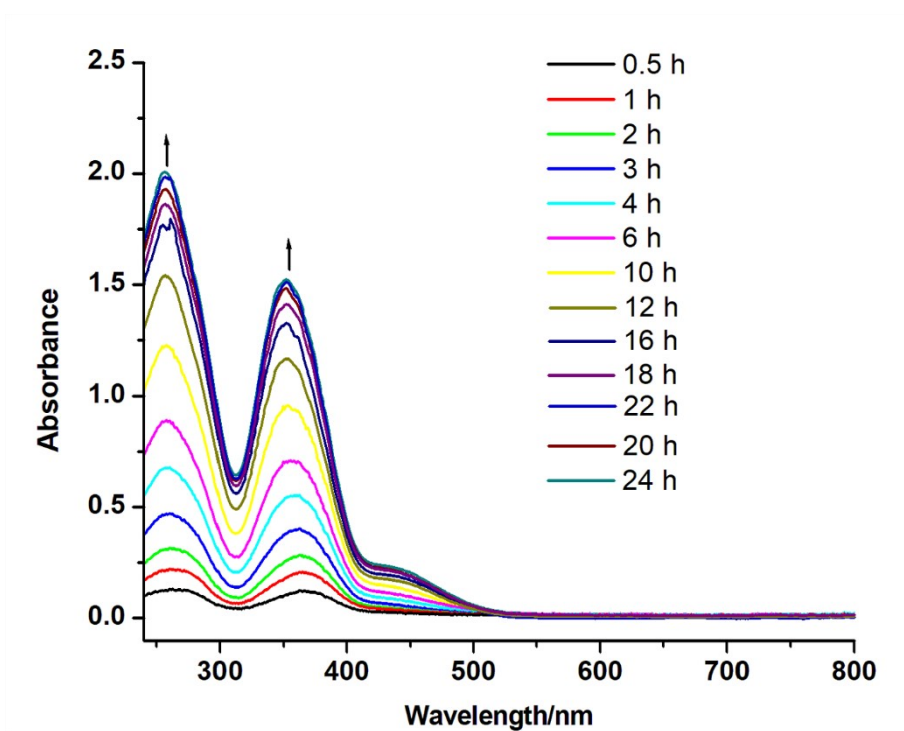

Fig. S9. The UV-vis absorbance spectra of  $\text{Cr}_2\text{O}_7^{2-}$  releasing process (100 fold molar ratio of that of  $\text{Cr}_2\text{O}_7^{2-}$ ).

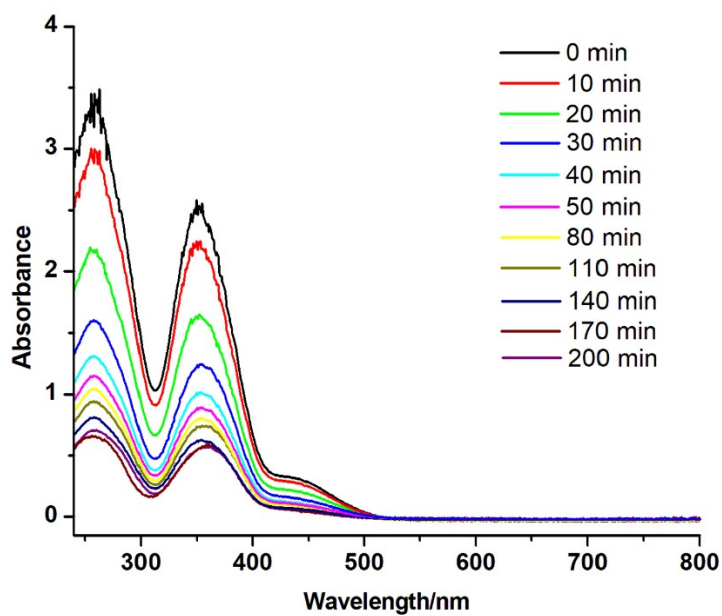

Fig. S10. Time-dependent UV-Vis absorption spectra of the  $\text{Cr}_2\text{O}_7^{2-}$  aqueous (4 mM) in the presence of 1- $\text{NO}_3$ .

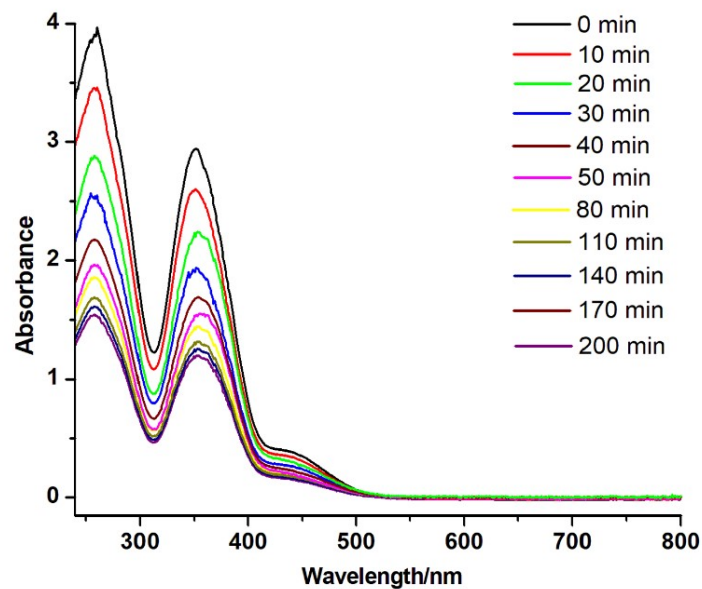

Fig. S11. Time-dependent UV-Vis absorption spectra of the  $\text{Cr}_2\text{O}_7^{2-}$  aqueous (6 mM) in the presence of **1-NO<sub>3</sub>**.

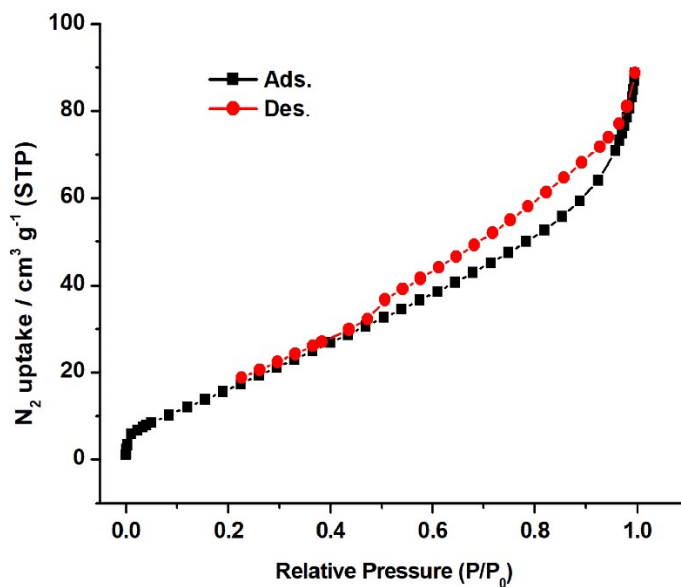

Fig. S12. Nitrogen sorption isotherm for **1-NO<sub>3</sub>** at 77 K

Table S1. Elemental analyses (ICP) of **1-Cr<sub>2</sub>O<sub>7</sub>** (Soak in 6 mM dichromate solution for 200 minutes).

| Sample                               | Wt% Ce | Wt% Cr | Molar ratio of Ce:Cr |
|--------------------------------------|--------|--------|----------------------|
| <b>1-Cr<sub>2</sub>O<sub>7</sub></b> | 80.9   | 19.1   | 1.92 : 1             |



Table S2. Elemental analyses of **1-NO<sub>3</sub>**, **1-NO<sub>3</sub>-I<sub>2</sub>**, and Photoirradiated **1-NO<sub>3</sub>-I<sub>2</sub>**.

| Sample                                                | Calculated formula                         | Experiment (%) |      |      |
|-------------------------------------------------------|--------------------------------------------|----------------|------|------|
|                                                       |                                            | C              | H    | N    |
| <b>1-NO<sub>3</sub></b>                               | $C_{26}H_{24}LaN_3O_{18}$                  | 38.69          | 3.06 | 5.28 |
| <b>1-NO<sub>3</sub>-I<sub>2</sub></b>                 | $C_{26}H_{24}LaN_3O_{18} \cdot 0.078(I_2)$ | 37.83          | 2.91 | 5.09 |
| Photoirradiated <b>1-NO<sub>3</sub>-I<sub>2</sub></b> | $C_{26}H_{24}LaN_3O_{18} \cdot 0.045(I_2)$ | 38.22          | 2.93 | 5.14 |
